# Supplementary material for: How do medical students engaging in elective courses on acupuncture and homeopathy differ from unselected students? A survey
Source: PubMed Central journal article supplement (PMC5343393; doi:10.1186/s12906-017-1653-z), 2017-03-09
Supplement: 12906_2017_1653_MOESM1_ESM.pdf [file 12906_2017_1653_MOESM1_ESM.pdf]

**Table S1**

Agreement to individual statements and summary scales to the 19 questions of module 1, part 1. Values are means (standard deviations = SD) or absolute frequencies (valid percentages)

| Question (number of missing observations)                                                | Acupuncture (n = 220) | Homeopathy (n = 113) | Control (n = 315) | Total (n = 648) | p-value§            |
|------------------------------------------------------------------------------------------|-----------------------|----------------------|-------------------|-----------------|---------------------|
| <b>CAM ORIENTATION</b>                                                                   |                       |                      |                   |                 |                     |
| <b>CAM interest</b>                                                                      |                       |                      |                   |                 |                     |
| I am interested in complementary and alternative medicine (0)                            |                       |                      |                   |                 |                     |
| - mean (SD)                                                                              | 1.3 (0.8)             | 1.2 (0.8)            | -0.1 (1.2)        | 0.6 (1.2)       |                     |
| - do not agree at all                                                                    | 0 (0.0%)              | 0 (0.0%)             | 41 (13.0%)        | 41 (6.3%)       | <.001               |
| - tend to disagree                                                                       | 9 (4.1%)              | 3 (2.7%)             | 79 (25.1%)        | 91 (14.0%)      | (**/**/-)           |
| - uncertain                                                                              | 25 (11.4%)            | 17 (15.0%)           | 94 (29.8%)        | 136 (21.0%)     |                     |
| - partly agree                                                                           | 78 (35.5%)            | 42 (37.2%)           | 67 (21.3%)        | 187 (28.9%)     |                     |
| - fully agree                                                                            | 108 (49.1%)           | 51 (45.1%)           | 34 (10.8%)        | 193 (29.8%)     |                     |
| Basics of complementary and alternative medicine should be taught in medical schools (0) |                       |                      |                   |                 |                     |
| - mean (SD)                                                                              | 1.2 (0.8)             | 1.3 (0.7)            | 0.1 (1.2)         | 0.7 (1.2)       |                     |
| - do not agree at all                                                                    | 1 (0.5%)              | 0 (0.0%)             | 39 (12.4%)        | 40 (6.2%)       | <.001               |
| - tend to disagree                                                                       | 6 (2.7%)              | 2 (1.8%)             | 66 (21.0%)        | 74 (11.4%)      | (**/**/-)           |
| - uncertain                                                                              | 28 (12.7%)            | 12 (10.6%)           | 88 (27.9%)        | 128 (19.8%)     |                     |
| - partly agree                                                                           | 93 (42.3%)            | 44 (38.9%)           | 82 (26.0%)        | 219 (33.8%)     |                     |
| - fully agree                                                                            | 92 (41.8%)            | 55 (48.7%)           | 40 (12.7%)        | 187 (28.9%)     |                     |
| Scale CAM interest                                                                       | 0.9 (0.6)             | 0.9 (0.7)            | -0.2 (0.9)        | 0.4 (1.0)       | <.001<br>(**/**/-)  |
| <b>Acupuncture</b>                                                                       |                       |                      |                   |                 |                     |
| I am interested in acupuncture (1)                                                       |                       |                      |                   |                 |                     |
| - mean (SD)                                                                              | 1.7 (0.5)             | 0.7 (1.0)            | 0.1 (1.3)         | 0.7 (1.3)       |                     |
| - do not agree at all                                                                    | 0 (0.0%)              | 1 (0.9%)             | 48 (15.3%)        | 49 (7.6%)       | <.001               |
| - tend to disagree                                                                       | 0 (0.0%)              | 10 (8.8%)            | 59 (18.8%)        | 69 (10.7%)      | (**/**/**)          |
| - uncertain                                                                              | 5 (2.3%)              | 34 (30.1%)           | 81 (25.8%)        | 120 (18.5%)     |                     |
| - partly agree                                                                           | 54 (24.5%)            | 40 (35.4%)           | 83 (26.4%)        | 177 (27.4%)     |                     |
| - fully agree                                                                            | 161 (73.2%)           | 28 (24.8%)           | 43 (13.7%)        | 232 (35.9%)     |                     |
| I consider acupuncture an effective therapy (3)                                          |                       |                      |                   |                 |                     |
| - mean (SD)                                                                              | 1.4 (0.7)             | 0.9 (0.9)            | 0.3 (1.1)         | 0.8 (1.1)       |                     |
| - do not agree at all                                                                    | 0 (0.0%)              | 1 (0.9%)             | 28 (8.9%)         | 29 (4.5%)       | <.001               |
| - tend to disagree                                                                       | 0 (0.0%)              | 6 (5.4%)             | 34 (10.9%)        | 40 (6.2%)       | (**/**/**)          |
| - uncertain                                                                              | 24 (10.9%)            | 33 (29.5%)           | 109 (34.8%)       | 166 (25.7%)     |                     |
| - partly agree                                                                           | 83 (37.7%)            | 40 (35.7%)           | 101 (32.2%)       | 224 (34.8%)     |                     |
| - fully agree                                                                            | 113 (51.4%)           | 32 (28.6%)           | 41 (13.1%)        | 186 (28.8%)     |                     |
| I have personal experiences with acupuncture (1)                                         |                       |                      |                   |                 |                     |
| - mean (SD)                                                                              | 0.9 (1.4)             | -0.5 (1.7)           | -0.8 (1.5)        | -0.2 (1.7)      |                     |
| - do not agree at all                                                                    | 22 (10.0%)            | 53 (46.9%)           | 174 (55.4%)       | 249 (38.5%)     | <.001               |
| - tend to disagree                                                                       | 27 (12.3%)            | 15 (13.3%)           | 38 (12.1%)        | 80 (12.4%)      | (**/-/**)           |
| - uncertain                                                                              | 19 (8.6%)             | 5 (4.4%)             | 20 (6.4%)         | 44 (6.8%)       |                     |
| - partly agree                                                                           | 42 (19.1%)            | 13 (11.5%)           | 35 (11.1%)        | 90 (13.9%)      |                     |
| - fully agree                                                                            | 110 (50.0%)           | 27 (23.9%)           | 47 (15.0%)        | 184 (28.4%)     |                     |
| Scale acupuncture                                                                        | 1.3 (0.7)             | 0.4 (1.0)            | -0.2 (1.1)        | 0.4 (1.1)       | <.001<br>(**/**/**) |

| Question (number of missing observations)                            | Acupuncture (n = 220) | Homeopathy (n = 113) | Control (n = 315) | Total (n = 648) | p-value§            |
|----------------------------------------------------------------------|-----------------------|----------------------|-------------------|-----------------|---------------------|
| <b>Homeopathy</b>                                                    |                       |                      |                   |                 |                     |
| I am interested in homeopathy (1)                                    |                       |                      |                   |                 |                     |
| - mean (SD)                                                          | 0.2 (1.2)             | 1.3 (0.9)            | -0.6 (1.2)        | 0.0 (1.4)       |                     |
| - do not agree at all                                                | 25 (11.4%)            | 0 (0.0%)             | 85 (27.0%)        | 110 (17.0%)     | <.001               |
| - tend to disagree                                                   | 36 (16.4%)            | 3 (2.7%)             | 100 (31.7%)       | 139 (21.5%)     | (**/**/)**          |
| - uncertain                                                          | 62 (28.2%)            | 19 (17.0%)           | 67 (21.3%)        | 148 (22.9%)     |                     |
| - partly agree                                                       | 59 (26.8%)            | 28 (25.0%)           | 40 (12.7%)        | 127 (19.6%)     |                     |
| - fully agree                                                        | 38 (17.3%)            | 62 (55.4%)           | 23 (7.3%)         | 123 (19.0%)     |                     |
| I consider homeopathy an effective therapy (1)                       |                       |                      |                   |                 |                     |
| - mean (SD)                                                          | 0.1 (1.1)             | 1.1 (1.0)            | -0.5 (1.2)        | -0.0 (1.2)      |                     |
| - do not agree at all                                                | 21 (9.5%)             | 1 (0.9%)             | 74 (23.6%)        | 96 (14.8%)      |                     |
| - tend to disagree                                                   | 31 (14.1%)            | 5 (4.4%)             | 84 (26.7%)        | 120 (18.6%)     |                     |
| - uncertain                                                          | 91 (41.4%)            | 27 (23.9%)           | 88 (28.0%)        | 206 (31.8%)     | <.001               |
| - partly agree                                                       | 54 (24.5%)            | 32 (28.3%)           | 53 (16.9%)        | 139 (21.5%)     | (**/**/)**          |
| - fully agree                                                        | 23 (10.5%)            | 48 (42.5%)           | 15 (4.8%)         | 86 (13.3%)      |                     |
| I have personal experience with homeopathy (2)                       |                       |                      |                   |                 |                     |
| - mean (SD)                                                          | 0.3 (1.5)             | 0.8 (1.5)            | -0.0 (1.5)        | 0.2 (1.5)       |                     |
| - do not agree at all                                                | 41 (18.7%)            | 16 (14.2%)           | 83 (26.4%)        | 140 (21.7%)     | <.001               |
| - tend to disagree                                                   | 30 (13.7%)            | 16 (14.2%)           | 43 (13.7%)        | 89 (13.8%)      | (**/**/)**          |
| - uncertain                                                          | 36 (16.4%)            | 5 (4.4%)             | 48 (15.3%)        | 89 (13.8%)      |                     |
| - partly agree                                                       | 45 (20.5%)            | 17 (15.0%)           | 74 (23.6%)        | 136 (21.1%)     |                     |
| - fully agree                                                        | 67 (30.6%)            | 59 (52.2%)           | 66 (21.0%)        | 192 (29.7%)     |                     |
| Scale homeopathy                                                     | 0.2 (1.1)             | 1.1 (1.0)            | -0.4 (1.1)        | 0.1 (1.2)       | <.001<br>(**/**/)** |
| <b>Beyond science</b>                                                |                       |                      |                   |                 |                     |
| Alternative practitioners are a threat for patients (3) §            |                       |                      |                   |                 |                     |
| - mean (SD)                                                          | -0.5 (1.0)            | -0.8 (1.0)           | -0.2 (1.1)        | -0.4 (1.1)      |                     |
| - do not agree at all                                                | 31 (14.2%)            | 28 (24.8%)           | 35 (11.2%)        | 94 (14.6%)      | <.001               |
| - tend to disagree                                                   | 83 (37.9%)            | 49 (43.4%)           | 94 (30.0%)        | 226 (35.0%)     | (**/**/)**          |
| - uncertain                                                          | 73 (33.3%)            | 25 (22.1%)           | 113 (36.1%)       | 211 (32.7%)     |                     |
| - partly agree                                                       | 22 (10.0%)            | 6 (5.3%)             | 47 (15.0%)        | 75 (11.6%)      |                     |
| - fully agree                                                        | 10 (4.6%)             | 5 (4.4%)             | 24 (7.7%)         | 39 (6.0%)       |                     |
| Conventional medicine does not grasp the patient entirely (0)        |                       |                      |                   |                 |                     |
| - mean (SD)                                                          | 1.0 (0.9)             | 0.9 (0.9)            | 0.2 (1.1)         | 0.6 (1.1)       |                     |
| - do not agree at all                                                | 2 (0.9%)              | 1 (0.9%)             | 19 (6.0%)         | 22 (3.4%)       | <.001               |
| - tend to disagree                                                   | 15 (6.8%)             | 5 (4.4%)             | 64 (20.3%)        | 84 (13.0%)      | (**/**/)-           |
| - uncertain                                                          | 37 (16.8%)            | 32 (28.3%)           | 117 (37.1%)       | 186 (28.7%)     |                     |
| - partly agree                                                       | 102 (46.4%)           | 40 (35.4%)           | 79 (25.1%)        | 221 (34.1%)     |                     |
| - fully agree                                                        | 64 (29.1%)            | 35 (31.0%)           | 36 (11.4%)        | 135 (20.8%)     |                     |
| If a therapy is used for centuries it shows that it is effective (2) |                       |                      |                   |                 |                     |
| - mean (SD)                                                          | 0.4 (0.9)             | 0.4 (0.9)            | -0.3 (1.1)        | 0.1 (1.0)       |                     |
| - do not agree at all                                                | 8 (3.6%)              | 5 (4.5%)             | 52 (16.6%)        | 65 (10.1%)      | <.001               |
| - tend to disagree                                                   | 26 (11.8%)            | 8 (7.1%)             | 75 (23.9%)        | 109 (16.9%)     | (**/**/)-           |
| - uncertain                                                          | 73 (33.2%)            | 42 (37.5%)           | 113 (36.0%)       | 228 (35.3%)     |                     |
| - partly agree                                                       | 94 (42.7%)            | 47 (42.0%)           | 67 (21.3%)        | 208 (32.2%)     |                     |
| - fully agree                                                        | 19 (8.6%)             | 10 (8.9%)            | 7 (2.2%)          | 36 (5.6%)       |                     |

| Question (number of missing observations)                               | Acupuncture (n = 220) | Homeopathy (n = 113) | Control (n = 315) | Total (n = 648) | p-value§            |
|-------------------------------------------------------------------------|-----------------------|----------------------|-------------------|-----------------|---------------------|
| <b>I am interested in esotericism (6)</b>                               |                       |                      |                   |                 |                     |
| - mean (SD)                                                             | -0.8 (1.0)            | -0.9 (1.1)           | -1.4 (0.9)        | -1.1 (1.0)      |                     |
| - do not agree at all                                                   | 63 (28.8%)            | 42 (37.8%)           | 182 (58.3%)       | 287 (44.7%)     | <.001               |
| - tend to disagree                                                      | 81 (37.0%)            | 40 (36.0%)           | 88 (28.2%)        | 209 (32.6%)     | (**/**/-)           |
| - uncertain                                                             | 50 (22.8%)            | 11 (9.9%)            | 23 (7.4%)         | 84 (13.1%)      |                     |
| - partly agree                                                          | 19 (8.7%)             | 14 (12.6%)           | 15 (4.8%)         | 48 (7.5%)       |                     |
| - fully agree                                                           | 6 (2.7%)              | 4 (3.6%)             | 4 (1.3%)          | 14 (2.2%)       |                     |
| Scale beyond science                                                    | 0.3 (0.6)             | 0.3 (0.6)            | 0.3 (0.7)         | 0.0 (0.7)       | <0.001<br>(**/**/-) |
| Overall scale CAM orientation                                           | 0.7 (0.6)             | 0.7 (0.6)            | -0.2 (0.8)        | 0.2 (0.8)       | <0.001<br>(**/**/-) |
| <b>SCIENCE ORIENTATION</b>                                              |                       |                      |                   |                 |                     |
| <b>Science is an important tool to detect the truth (1)</b>             |                       |                      |                   |                 |                     |
| - mean (SD)                                                             | 1.2 (0.8)             | 1.2 (0.7)            | 1.5 (0.7)         | 1.3 (0.7)       |                     |
| - do not agree at all                                                   | 0 (0.0%)              | 0 (0.0%)             | 1 (0.3%)          | 1 (0.2%)        | <.001               |
| - tend to disagree                                                      | 6 (2.7%)              | 1 (0.9%)             | 3 (1.0%)          | 10 (1.5%)       | (**/**/-)           |
| - uncertain                                                             | 27 (12.3)             | 18 (16.1%)           | 19 (6.0%)         | 64 (9.9%)       |                     |
| - partly agree                                                          | 97 (44.1%)            | 47 (42.0%)           | 119 (37.8%)       | 263 (40.6%)     |                     |
| - fully agree                                                           | 90 (40.9%)            | 46 (41.1%)           | 173 (54.9%)       | 309 (47.8%)     |                     |
| <b>Medicine should be firmly grounded on science (2)</b>                |                       |                      |                   |                 |                     |
| - mean (SD)                                                             | 0.7 (0.9)             | 0.8 (0.9)            | 1.1 (0.8)         | 0.9 (0.9)       |                     |
| - do not agree at all                                                   | 2 (0.9%)              | 2 (1.8%)             | 1 (0.3%)          | 5 (0.8%)        | <.001               |
| - tend to disagree                                                      | 11 (5.0%)             | 4 (3.5%)             | 12 (3.8%)         | 27 (4.2%)       | (**/**/-)           |
| - uncertain                                                             | 69 (31.7%)            | 34 (30.1%)           | 47 (14.9%)        | 150 (23.2%)     |                     |
| - partly agree                                                          | 94 (43.1%)            | 48 (42.5%)           | 138 (43.8%)       | 280 (43.3%)     |                     |
| - fully agree                                                           | 42 (19.3%)            | 25 (22.1%)           | 117 (37.1%)       | 184 (28.5%)     |                     |
| Scale scientific orientation                                            | 1.0 (0.7)             | 1.0 (0.7)            | 1.3 (0.6)         | 1.1 (0.7)       | <.001<br>(**/**/-)  |
| <b>CARE ORIENTATION</b>                                                 |                       |                      |                   |                 |                     |
| <b>I like to volunteer for other people (1)</b>                         |                       |                      |                   |                 |                     |
| - mean (SD)                                                             | 1.2 (0.7)             | 1.4 (0.7)            | 1.1 (0.8)         | 1.2 (0.8)       |                     |
| - do not agree at all                                                   | 1 (0.5%)              | 0 (0.0%)             | 2 (0.6%)          | 3 (0.5%)        | .002                |
| - tend to disagree                                                      | 3 (1.4%)              | 1 (0.9%)             | 10 (3.2%)         | 14 (2.2%)       | (-/*/*)             |
| - uncertain                                                             | 22 (10.0%)            | 11 (9.7%)            | 50 (15.9%)        | 83 (12.8%)      |                     |
| - partly agree                                                          | 110 (50.2%)           | 43 (38.1%)           | 145 (46.0%)       | 298 (46.1%)     |                     |
| - fully agree                                                           | 83 (37.9%)            | 58 (51.3%)           | 108 (34.3%)       | 249 (38.5%)     |                     |
| <b>I am good in putting myself in the position of somebody else (0)</b> |                       |                      |                   |                 |                     |
| - mean (SD)                                                             | 1.1 (0.7)             | 1.3 (0.6)            | 1.2 (0.7)         | 1.2 (0.7)       |                     |
| - do not agree at all                                                   | 0 (0.0%)              | 0 (0.0%)             | 1 (0.3%)          | 1 (0.2%)        | .329                |
| - tend to disagree                                                      | 3 (1.4%)              | 0 (0.0%)             | 5 (1.6%)          | 8 (1.2%)        | (-/-/-)             |
| - uncertain                                                             | 26 (11.8%)            | 13 (11.5%)           | 38 (12.1%)        | 77 (11.9%)      |                     |
| - partly agree                                                          | 129 (58.6%)           | 59 (52.2%)           | 172 (54.6%)       | 360 (55.6%)     |                     |
| - fully agree                                                           | 62 (28.2%)            | 41 (36.3%)           | 99 (31.4%)        | 202 (31.2%)     |                     |

| Question (number of missing observations)                                                       | Acupuncture (n = 220) | Homeopathy (n = 113) | Control (n = 315) | Total (n = 648) | p-value§           |
|-------------------------------------------------------------------------------------------------|-----------------------|----------------------|-------------------|-----------------|--------------------|
| <b>The desire to help other people was an important motivation for me to study medicine (0)</b> |                       |                      |                   |                 |                    |
| - mean (SD)                                                                                     | 1.2 (0.8)             | 1.4 (0.8)            | 0.9 (0.9)         | 1.1 (0.9)       |                    |
| - do not agree at all                                                                           | 0 (0.0%)              | 0 (0.0%)             | 5 (1.6%)          | 5 (0.8%)        |                    |
| - tend to disagree                                                                              | 10 (4.5%)             | 3 (2.7%)             | 22 (7.0%)         | 35 (5.4%)       |                    |
| - uncertain                                                                                     | 29 (13.2%)            | 11 (9.7%)            | 52 (16.5%)        | 92 (14.2%)      | <.001              |
| - partly agree                                                                                  | 89 (40.5%)            | 42 (37.2%)           | 142 (45.1%)       | 273 (42.1%)     | (*/**/-)           |
| - fully agree                                                                                   | 92 (41.8%)            | 57 (50.4%)           | 94 (29.8%)        | 243 (37.5%)     |                    |
| Scale social orientation                                                                        | 1.2 (0.5)             | 1.3 (0.5)            | 1.1 (0.6)         | 1.2 (0.6)       | <.001<br>(*/**/*)  |
| <b>STATUS ORIENTATION</b>                                                                       |                       |                      |                   |                 |                    |
| <b>The high social reputation of physicians was a motivation to study medicine (0)</b>          |                       |                      |                   |                 |                    |
| - mean (SD)                                                                                     | -0.5 (1.1)            | -0.5 (1.0)           | -0.0 (1.1)        | -0.3 (1.1)      |                    |
| - do not agree at all                                                                           | 39 (17.7%)            | 21 (18.6%)           | 33 (10.5%)        | 93 (14.4%)      | <.001              |
| - tend to disagree                                                                              | 79 (35.9%)            | 39 (34.5%)           | 72 (22.9%)        | 190 (29.3%)     | (**/**/-)          |
| - uncertain                                                                                     | 58 (26.4%)            | 33 (29.2%)           | 103 (32.7%)       | 194 (29.9%)     |                    |
| - partly agree                                                                                  | 38 (17.3%)            | 16 (14.2%)           | 90 (28.6%)        | 144 (22.2%)     |                    |
| - fully agree                                                                                   | 6 (2.7%)              | 4 (3.5%)             | 17 (5.4%)         | 27 (4.2%)       |                    |
| <b>The high income of physicians was a motivation to study medicine (0)</b>                     |                       |                      |                   |                 |                    |
| - mean (SD)                                                                                     | -0.6 (1.1)            | -0.6 (1.0)           | -0.3 (1.1)        | -0.5 (1.1)      |                    |
| - do not agree at all                                                                           | 57 (25.9%)            | 25 (22.1%)           | 53 (16.8%)        | 135 (20.8%)     | .002               |
| - tend to disagree                                                                              | 65 (29.5%)            | 43 (38.1%)           | 94 (29.8%)        | 202 (31.2%)     | (*/**/-)           |
| - uncertain                                                                                     | 63 (28.6%)            | 29 (25.7%)           | 85 (27.0%)        | 177 (27.3%)     |                    |
| - partly agree                                                                                  | 30 (13.6%)            | 12 (10.6%)           | 69 (21.9%)        | 111 (17.1%)     |                    |
| - fully agree                                                                                   | 5 (2.3%)              | 4 (3.5%)             | 14 (4.4%)         | 23 (3.5%)       |                    |
| Scale status orientation                                                                        | -0.6 (1.0)            | -0.6 (1.0)           | -0.2 (1.0)        | -0.4 (1.0)      | <.001<br>(**/**/-) |

P-values from Kruskal-Wallis test (single items) or ANOVA (summary scale) for three-group comparisons, for pairwise comparisons from Mann-Whitney-U or t-test: -  $p \geq .05$ ; \*  $p = 0.002$  to  $p = 0.049$ ; \*\*  $p \leq 0,001$  (1. position: acupuncture vs. control, 2. position: homeopathy vs. control; 3. position: acupuncture vs. homeopathy).

§ Item reversely coded for building summary scale
